# Supplementary material for: FTO-free counter electrodes for dye-sensitized solar cells using carbon nanosheets synthesised from a polymeric carbon source
Source: Royal Society of Chemistry journal article supplement (doi:10.1039/c4cp01913j), 2014-01-01
Supplement: c4cp01913j1.pdf [file c4cp01913j1.pdf]

## Supplementary Information

### FTO-free counter electrodes for dye-sensitized solar cells using carbon nanosheets from a polymeric carbon source

Zico Alaia Akbar,<sup>a§</sup> Jae-Seon Lee,<sup>b,c§</sup> Jinhyeon Kang,<sup>a</sup> Han-Ik Joh,<sup>b</sup>

Sungho Lee,<sup>b,c\*</sup> Sung-Yeon Jang<sup>a\*</sup>

<sup>a</sup>Department of Chemistry, Kookmin University, Seoul 136-702, Korea

<sup>b</sup>Carbon Convergence Materials Research Center, Korea Institute of Science and Technology,  
Wanju, Jeollabuk-do 565-905 Korea

<sup>c</sup>Department of Nano Material engineering, University of Science and Technology, Deajeon 305-  
350, Korea

\*Corresponding author:

Tel: +82-63-219-8134; Fax: +82-63-219-8269, E-mail address: sunghol@kist.re.kr (Sungho Lee)

\*Corresponding author:

Tel: +82-2-910-5768; Fax: +82-2-910-5768, E-mail address: syjang@kookmin.ac.kr (Sung-Yeon Jang)

§These authors contributed to this paper equally

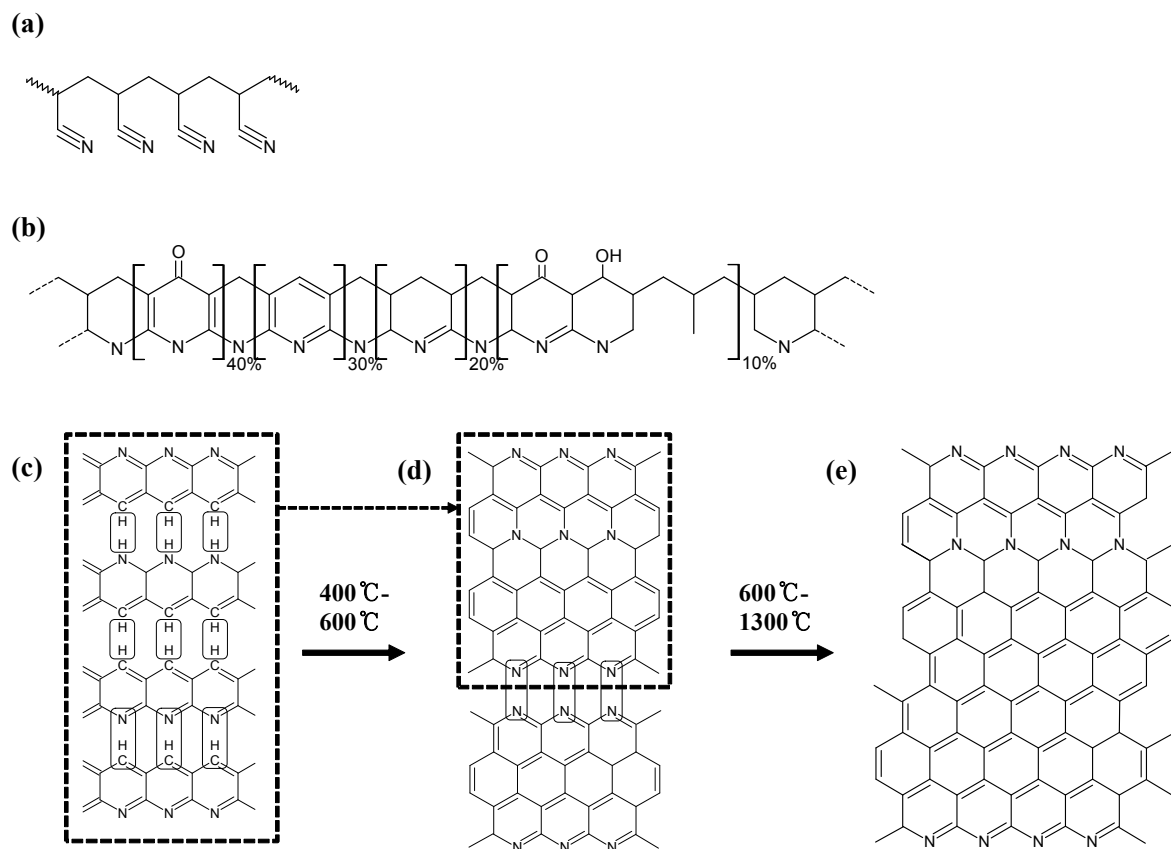

**Fig. S1.** The reaction mechanism of the preparation of CNS-CE using PAN as the precursor; (a) structure of PAN, (b) the structure of oxidized PAN, (c-e) the reaction during carbonization [1].

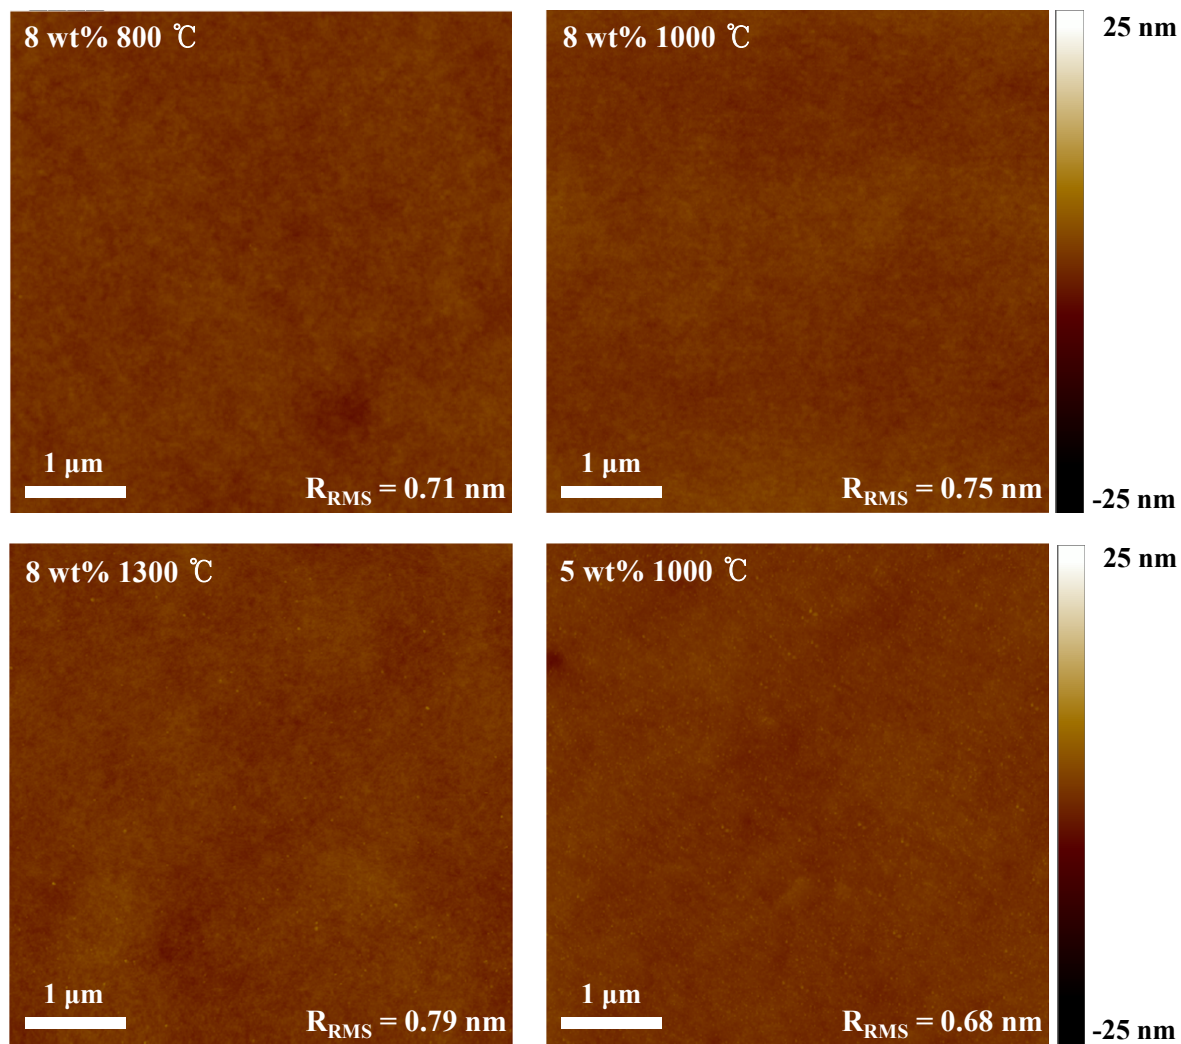

**Fig. S2.** AFM images of CNS-CEs carbonized at various conditions. All the samples showed similar root mean square roughness.

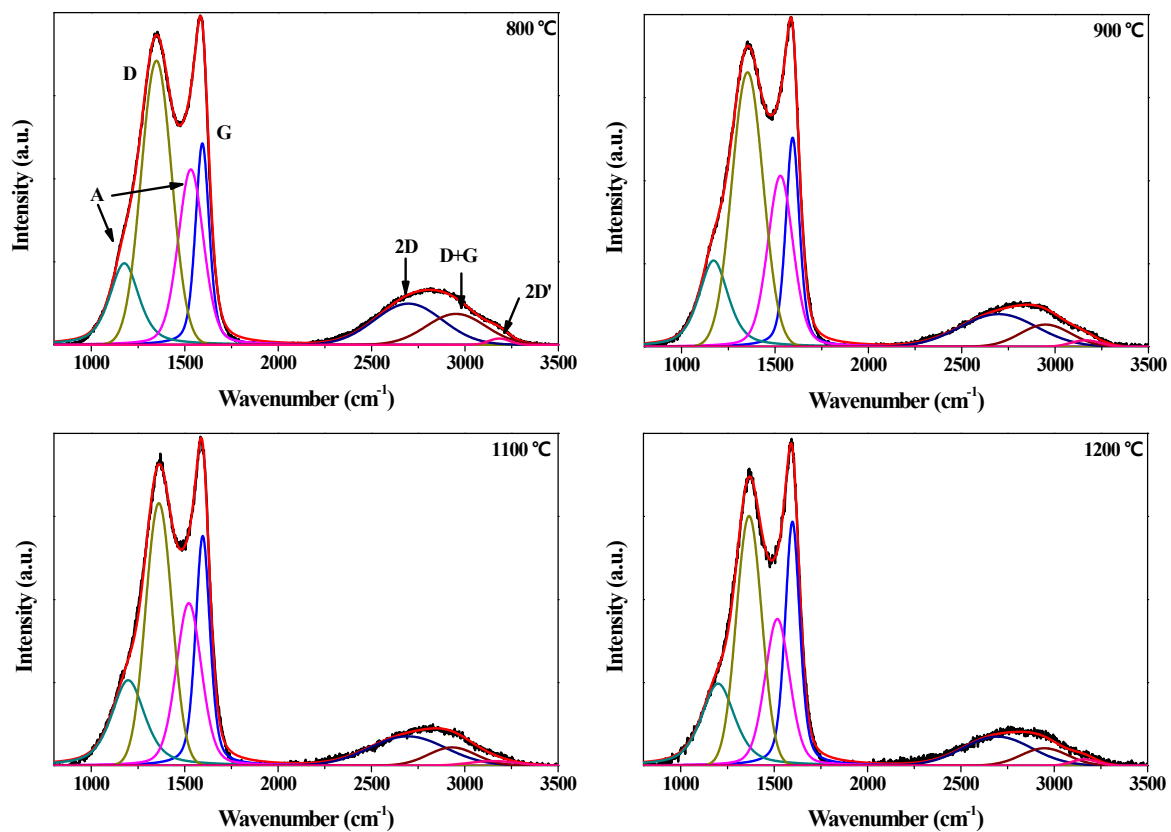

**Fig. S3.** Deconvoluted version Raman spectra of CNSs prepared at a range of carbonization temperatures.

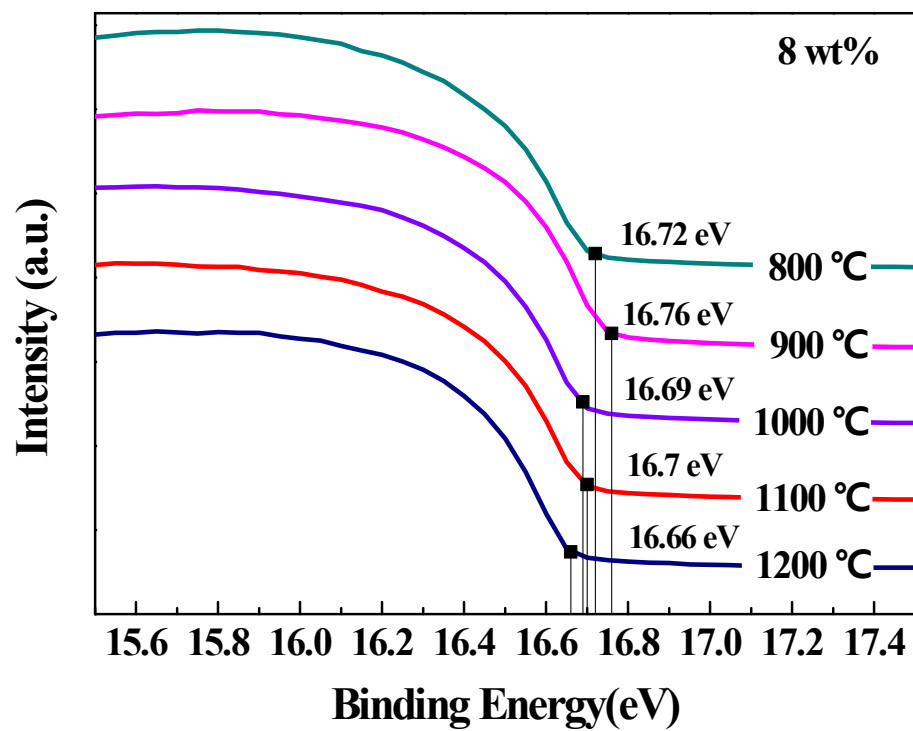

**Fig.e S4.** The UPS analysis results of CNS-CEs prepared at various carbonization temperatures.

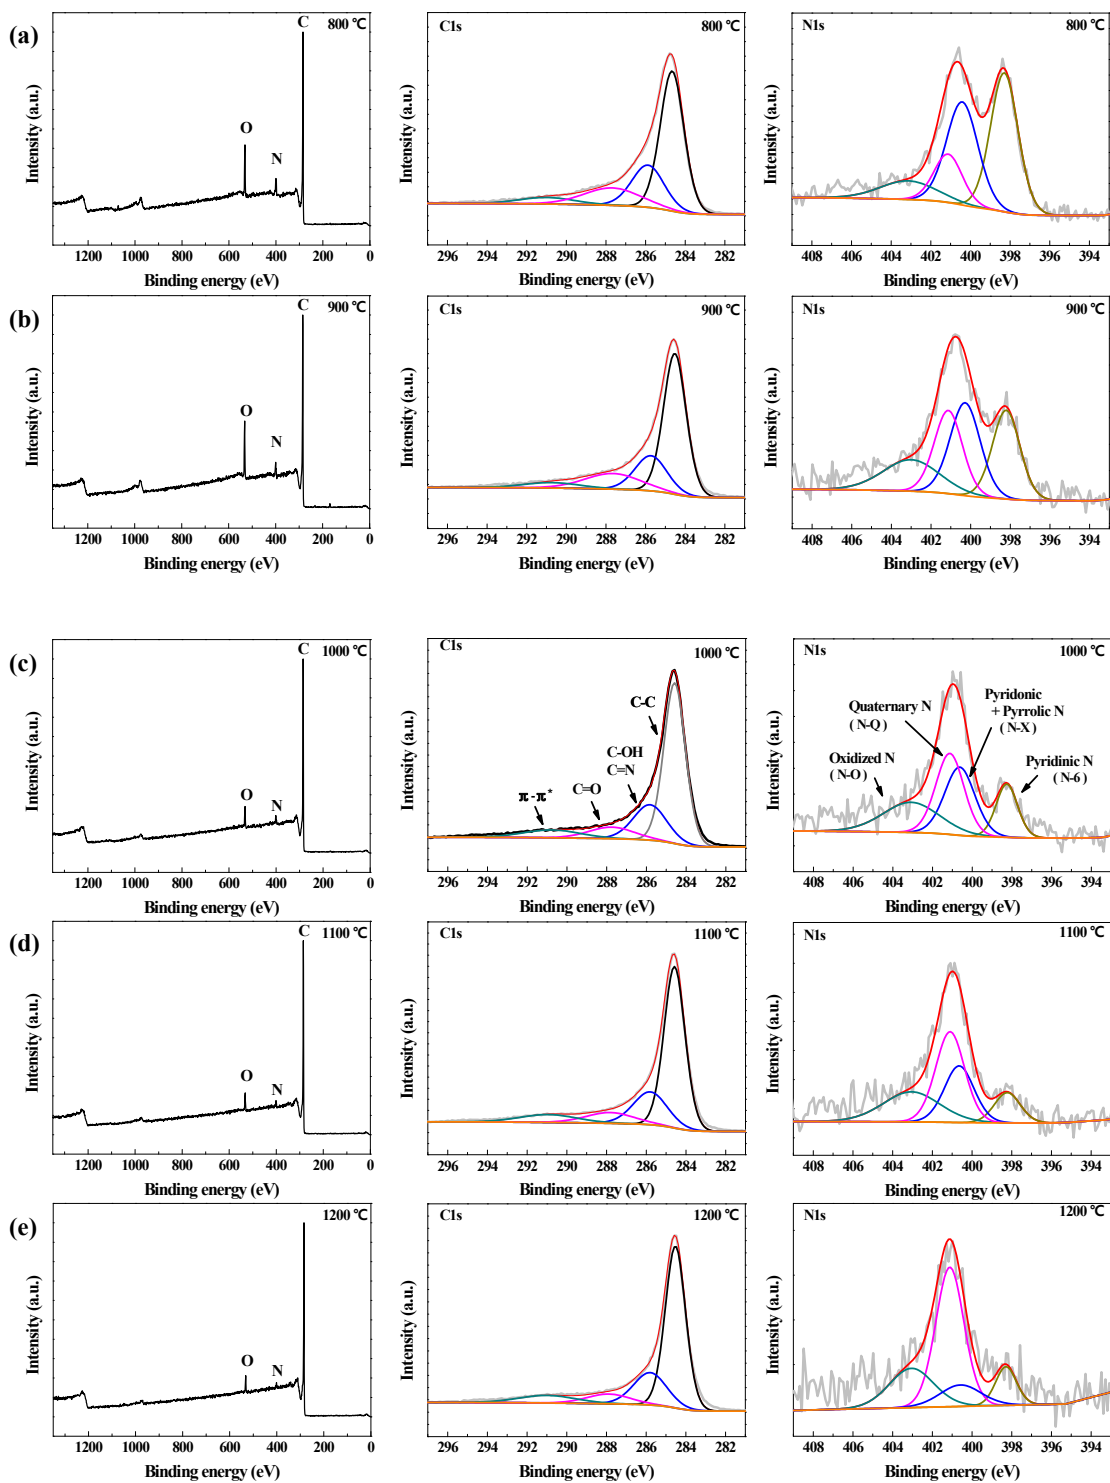

**Fig. S5.** The XPS spectra of various CNSs; (a) 800 °C, (b) 900 °C, (c) 1000 °C, (d) 1100 °C, (e) 1200 °C. The detailed indications for the deconvoluted peaks are shown in (c).

**Table S1.** Atomic composition of various CNSs obtained from XPS spectra.

| <b>CNS sample</b> | <b>C<br/>(atomic%)</b> | <b>O<br/>(atomic%)</b> | <b>N<br/>(atomic%)</b> |
|-------------------|------------------------|------------------------|------------------------|
| CNS-800           | 81.81                  | 11.17                  | 7.01                   |
| CNS-900           | 85.66                  | 9.53                   | 4.81                   |
| CNS-1000          | 91.57                  | 4.89                   | 3.53                   |
| CNS-1100          | 93.08                  | 3.88                   | 3.04                   |
| CNS-1200          | 94.46                  | 3.35                   | 2.19                   |

## Reference

- [1] M. Rahaman, A.F. Ismail, A. Mustafa, A review of heat treatment on polyacrylonitrile fiber, *Polym. Degrad. Stab.* 92 (2007) 1421-1432.
